# Supplementary material
Source: publisher site journal article supplement (https://www.spandidos-publications.com/3749/downloadSupplementary)
Supplement: Supplementary file 1 [file downloadSupplementary]

Figure S1. Representative tumor images from different treatment groups of xenografts. Scale bars, 10 mm. LNCaP cells transfected with recombinant lentiviral vectors (*OPHN1* overexpression, OPHN1-OE) were injected into mice subcutaneously (20 mice/group), and then the tumor growth was monitored, while the LNCaP cells transfected with empty vectors were injected as controls. *OPHN1*, oligophrenin 1.

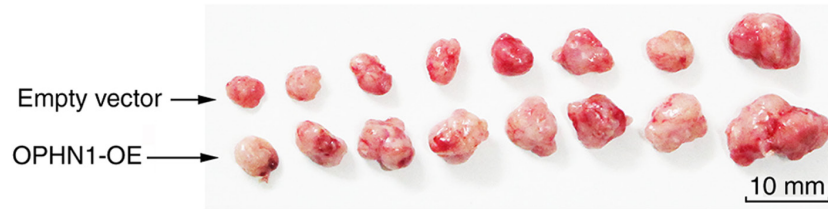

Table SI. Clinical variables of the cohorts.

| Characteristics             | Datasets                |                                       |                    |                           |
|-----------------------------|-------------------------|---------------------------------------|--------------------|---------------------------|
|                             | MCTP<br>(59 cases)      | SU2C/PCF<br>Dream Team<br>(429 cases) | MSK<br>(424 cases) | Provisional<br>(53 cases) |
| Age (years, mean $\pm$ SD)  | 70.71 $\pm$ 7.53        | 61.34 $\pm$ 8.11                      | 65.56 $\pm$ 9.18   | 60.07 $\pm$ 7.8           |
| Race (cases)                |                         |                                       |                    |                           |
| Caucasian                   | N/A                     | N/A                                   | 312                | 72                        |
| African American            | N/A                     | N/A                                   | 26                 |                           |
| Other                       | N/A                     | N/A                                   | 85                 | 3                         |
| Total PSA (ng/ml)           | 1,142.19 $\pm$ 1,818.16 | 164.47 $\pm$ 941.90                   | 244.8 $\pm$ 972.58 | N/A                       |
| Gleason score (cases)       |                         |                                       |                    |                           |
| $\leq$ 6                    | 0                       | 29                                    | 19                 | 6                         |
| 7                           | 2                       | 107                                   | 85                 | 18                        |
| $>$ 8                       | 9                       | 222                                   | 280                | 51                        |
| NA                          | 50                      | 86                                    | 40                 | 0                         |
| Overall survival (months)   | 36.45 $\pm$ 31.96       | 20.62 $\pm$ 12.53                     | 30.09 $\pm$ 22.21  | N/A                       |
| Therapy (cases)             |                         |                                       |                    |                           |
| ADT                         | 48                      | N/A                                   | 332                | 66                        |
| Prostatectomy               | 17                      | 444                                   | N/A                | 51                        |
| Chemotherapy                | 45                      | 350                                   | N/A                | 25                        |
| Radiotherapy                | 27                      | N/A                                   | N/A                | N/A                       |
| AR amplification (cases)    | 27                      | 208                                   | 27                 | 3                         |
| OPHN1 amplification (cases) | 16                      | 166                                   | 0                  | 1                         |

MCTP data adapted from Ref (16); SU2C/PCF data adapted from Ref (17); MSK data adapted from Ref (18); and Provisional data adapted from The Metastatic Prostate Cancer Project (provisional, November 2019). ADT, androgen deprivation therapy; MCTP, Michigan Center for Translational Pathology; SU2C/PCF, Stand Up to Cancer/Prostate Cancer Foundation; MSK, Memorial Sloan Kettering; N/A, not available.
